# Supplementary material for: Development of a 10-year (2001–2010) 0.1° data set of land-surface energy balance for mainland China
Source: Copernicus journal article supplement (doi:10.5194/acp-14-13097-2014), 2014-12-10
Supplement: Supplementary file 1 [file acp-14-13097-2014-supplement.zip]

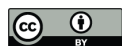

## *Supplement of*

# **Development of a 10-year (2001–2010) $0.1^\circ$ data set of land-surface energy balance for mainland China**

**X. Chen et al.**

*Correspondence to:* X. Chen (x.chen@utwente.nl)

- acp-14-13097-2014-supplement-cover-letter.pdf
- New folder
  - Ali.tif
  - BJ.tif
  - Daxing.tif
  - Dontan.tif
  - Fig 1.tif
  - Fig 2.tif
  - Guantao.tif
  - Maqu.tif
  - Miyun.tif
  - Wenjiang.tif
  - caption for each supplementary figure.docx
